# Supplementary material for: HZ08 suppresses RelB-activated MnSOD expression and enhances Radiosensitivity of prostate Cancer cells
Source: Springer Nature journal article supplement (doi:10.1186/s13046-018-0849-5), 2018-07-26
Supplement: MOESM1 [file 15983382]

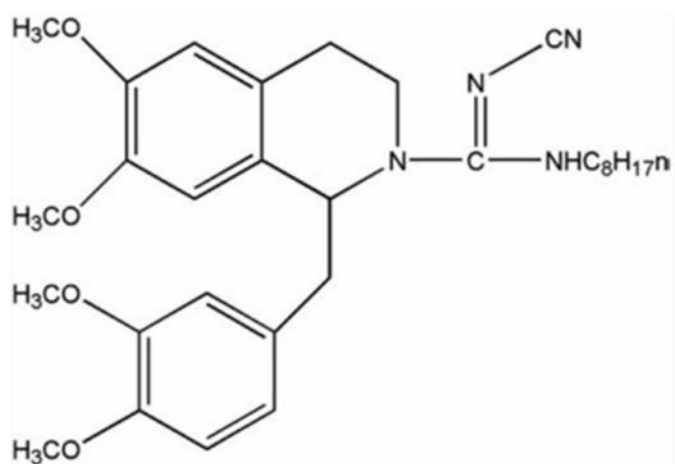

**Fig. S1. HZ08 chemical structure.**
