# Supplementary material for: HZ08 suppresses RelB-activated MnSOD expression and enhances Radiosensitivity of prostate Cancer cells
Source: Springer Nature journal article supplement (doi:10.1186/s13046-018-0849-5), 2018-07-26
Supplement: MOESM2 [file 15983382]

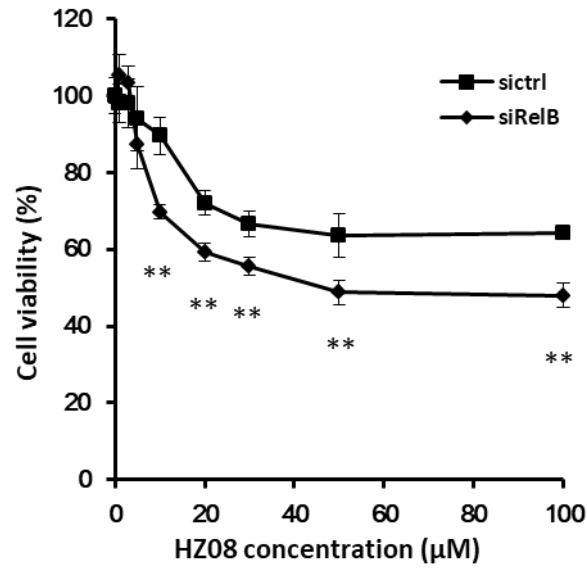

**Fig. S2. The cytotoxic effect of HZ08 in PC-3 cells.** PC-3 and RelB-silenced PC-3 cells were treated with a serial concentration of HZ08 as indicated and cytotoxicity was analyzed by MTT assay. Mean  $\pm$  SD was representative of three independent experiments carried out in duplication.  $** (P < 0.01)$  shows the significances between two groups as indicated.
