# Supplementary material for: HZ08 suppresses RelB-activated MnSOD expression and enhances Radiosensitivity of prostate Cancer cells
Source: Springer Nature journal article supplement (doi:10.1186/s13046-018-0849-5), 2018-07-26
Supplement: MOESM3 [file 15983382]

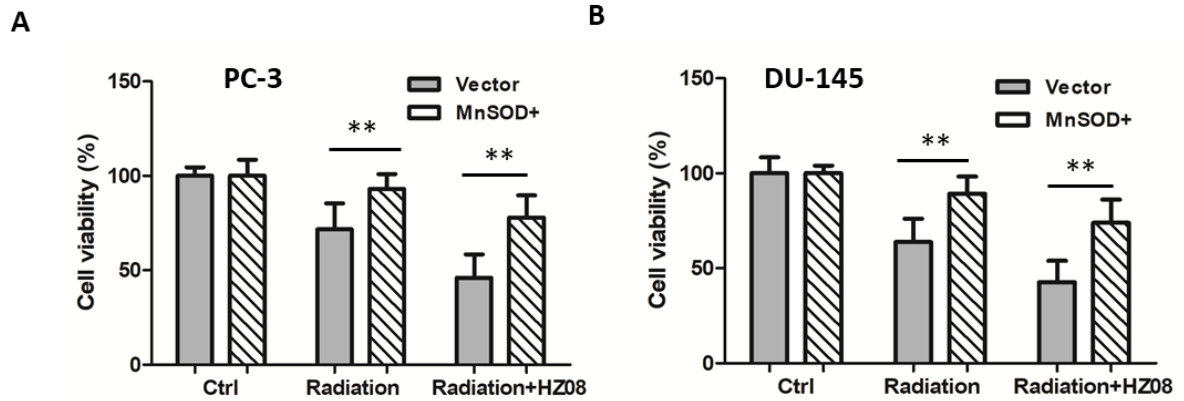

**Fig. S3. The reverse effect of transfected MnSOD on cell viability of HZ08 and IR-treated cells.** PC-3 (A) and DU-145 cells (B) were transfected with a MnSOD expression construct, and then treated with 5  $\mu$ M HZ08 and 6 Gy IR. Cell viability was quantified by MTT. Mean  $\pm$ SD was representative of three independent experiments carried out in duplication. **\*\***( $P < 0.01$ ) shows the significances between two groups as indicated.
