# Supplementary material for: HZ08 suppresses RelB-activated MnSOD expression and enhances Radiosensitivity of prostate Cancer cells
Source: Springer Nature journal article supplement (doi:10.1186/s13046-018-0849-5), 2018-07-26
Supplement: MOESM4 [file 15983382]

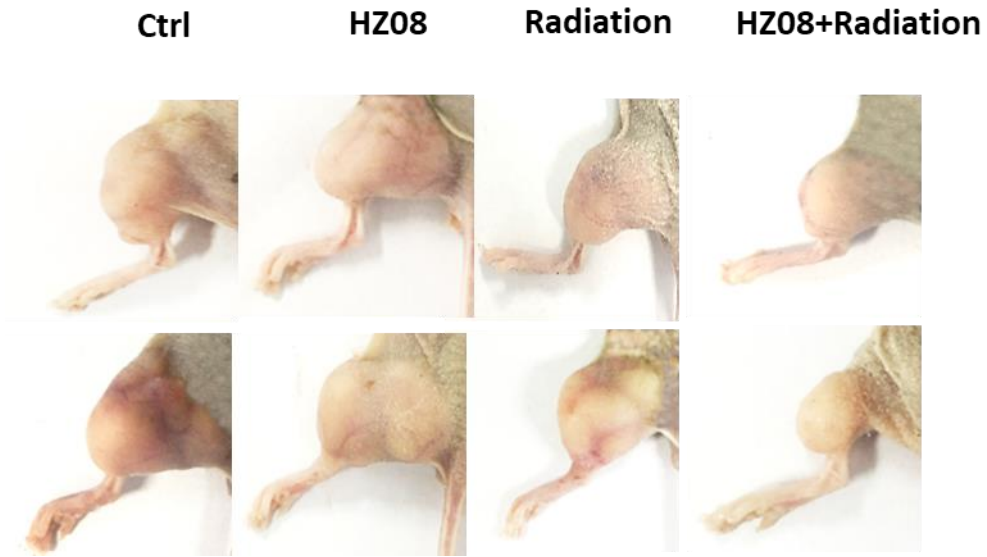

**Fig. S4. The effect of HZ08 on radiosensitization of PC-3 cell bearing tumors in nude mice.** The tumor volumes of mice with different treatments were indicated above.
